# Supplementary material for: Creating and parameterizing patient-specific deep brain stimulation pathway-activation models using the hyperdirect pathway as an example
Source: PubMed Central journal article supplement (PMC5404874; doi:10.1371/journal.pone.0176132), 2017-04-25
Supplement: pone.0176132.s005.pdf [file pone.0176132.s005.pdf]

**S1 Table.** Imaging parameters. All MRI scans were acquired pre-operatively while the CT scan was acquired post-operatively. T2W and SW images were acquired in both coronal and axial orientations.

| Image    | Sequence                                                      | FOV (mm <sup>3</sup> ) | Matrix      | Voxel resolution (mm <sup>3</sup> ) | Other parameters                                                                                                                                                                                      | Acquisition time (minutes) |
|----------|---------------------------------------------------------------|------------------------|-------------|-------------------------------------|-------------------------------------------------------------------------------------------------------------------------------------------------------------------------------------------------------|----------------------------|
| 1.5T T1W | 3D gradient echo MPRAGE                                       | 250x187x176            | 256x192x176 | 0.98x0.98x1.0                       | TR = 1650 ms<br>TI = 1100 ms<br>TE = 3.02 ms<br>Flip angle = 15°                                                                                                                                      | 10                         |
| 7T T1W   | 3D gradient echo MPRAGE                                       | 230x187x153            | 312x384x256 | 1.0x1.0x1.0                         | TR = 3100 ms<br>TI = 1500 ms<br>TE = 3.5 ms<br>Flip angle = 6°<br>Acceleration factor of 2 (GRAPPA) along the phase-encoding direction.                                                               | 6.5                        |
| 7T T2W   | 2D turbo spin echo                                            | 200x200x26             | 512x512x26  | 0.39x0.39x1.0                       | TR = 9000 ms<br>TE = 58 ms<br>Flip angle = 150°<br>Acceleration factor of 3 (GRAPPA) along the phase-encoding direction.                                                                              | 7.5                        |
| 7T SW    | 3D flow-compensated gradient echo                             | 200x200x48             | 512x512x60  | 0.39x0.39x0.8                       | TR = 28 ms<br>TE = 21 ms<br>Flip angle = 17°<br>Pixel bandwidth = 121 Hz/pixel<br>6/8 partial Fourier parallel imaging using an acceleration factor of 2 (GRAPPA) along the phase-encoding direction. | 4                          |
| 7T DW    | Single refocused 2D single-shot spin echo echo planar imaging | 204x204x99             | 136x136x66  | 1.5x1.5x1.5                         | TR = 4896 ms<br>TE = 56 ms<br>Flip angle = 90°<br>Pixel bandwidth = 1671 Hz/pixel<br>Acceleration factor of 3 (GRAPPA).                                                                               | 4.5                        |
| CT       | -                                                             | 302x200x302            | 512x334x512 | 0.59x0.6x0.59                       | 120 kV<br>315 mAs<br>Gantry tilt = 0.0°                                                                                                                                                               | 0.5                        |
