# Supplementary material for: Creating and parameterizing patient-specific deep brain stimulation pathway-activation models using the hyperdirect pathway as an example
Source: PubMed Central journal article supplement (PMC5404874; doi:10.1371/journal.pone.0176132), 2017-04-25
Supplement: pone.0176132.s006.pdf [file pone.0176132.s006.pdf]

**S2 Table.** Software programs utilized in the scientific workflow.

| <b>Software</b>     | <b>Version</b> | <b>Website</b>                 | <b>Citation</b>           |
|---------------------|----------------|--------------------------------|---------------------------|
| COMSOL Multiphysics | 5.1            | comsol.com/comsol-multiphysics | -                         |
| Python              | 2.7.8          | python.org                     | -                         |
| MATLAB              | 8.0.0.783      | mathworks.com/products/matlab  | -                         |
| NEURON              | 7.3            | neuron.yale.edu                | Hines and Carnevale, 2001 |
| FSL                 | 5.0.7          | fsl.fmrib.ox.ac.uk/fsl/fslwiki | Jenkinson et al., 2012    |
| Freesurfer          | 5.3.0          | surfer.nmr.mgh.harvard.edu     | Fischl, 2012              |
| Seg3D               | 2.3.0          | seg3d.org                      | -                         |
| Cicerone            | -              | ciceronedbs.org                | Miocinovic et al., 2007   |
| MeshLab             | 1.3.3          | meshlab.sourceforge.net        | -                         |
| 3DSlicer            | 4.4.0          | slicer.org                     | -                         |
