# Supplementary material for: Creating and parameterizing patient-specific deep brain stimulation pathway-activation models using the hyperdirect pathway as an example
Source: PubMed Central journal article supplement (PMC5404874; doi:10.1371/journal.pone.0176132), 2017-04-25
Supplement: pone.0176132.s007.pdf [file pone.0176132.s007.pdf]

**S3 Table.** Isotropic conductivities for tissue types.

| <b>Tissue</b>       | <b>Isotropic conductivity (S/m)</b> |
|---------------------|-------------------------------------|
| Grey matter         | 0.23                                |
| White matter        | 0.14                                |
| Cerebrospinal fluid | 1.45                                |
| Glial scar          | 0.07                                |
| Muscle              | 0.32116                             |
| Tendon              | 0.38271                             |
| Bone                | 0.020157                            |
| Fat                 | 0.022405                            |
| Skin                | 0.00020006                          |
| Disk                | 0.65                                |
| Blood               | 0.7                                 |
| Air                 | 1e-12                               |
