# Supplementary material for: Creating and parameterizing patient-specific deep brain stimulation pathway-activation models using the hyperdirect pathway as an example
Source: PubMed Central journal article supplement (PMC5404874; doi:10.1371/journal.pone.0176132), 2017-04-25
Supplement: pone.0176132.s008.pdf [file pone.0176132.s008.pdf]

**S4 Table.** Images and methods for segmenting structures.

| <b>Structure</b>         | <b>MRI</b>             | <b>Method</b>          |
|--------------------------|------------------------|------------------------|
| Thalamus                 | 1.5T T1W               | Manual fitting         |
| Caudate                  | 7T T1W                 | Manual segmentation    |
| Putamen                  | 7T T2W (or SW) axial   | Manual segmentation    |
| Globus pallidus externus | 7T T2W (or SW) axial   | Manual segmentation    |
| Globus pallidus internus | 7T T2W (or SW) axial   | Manual segmentation    |
| Subthalamic nucleus      | 7T T2W (or SW) coronal | Manual segmentation    |
| Substantia nigra         | 7T T2W (or SW) coronal | Manual segmentation    |
| Red nucleus              | 7T T2W (or SW) coronal | Manual segmentation    |
| Contralateral hemisphere | 1.5T T1W               | Automated segmentation |
| Cerebrospinal fluid      | 1.5T T1W               | Automated segmentation |
